# Supplementary material for: Gene network analysis of poplar root transcriptome in response to drought stress identifies a PtaJAZ3PtaRAP2.6-centered hierarchical network
Source: PubMed Central journal article supplement (PMC6291141; doi:10.1371/journal.pone.0208560), 2018-12-12
Supplement: pone.0208560.s005.pdf [file pone.0208560.s005.pdf]

**S1 Table. Primers used for the qRT-PCR gene expression analysis.**

| <b>Gene name</b>  | <b>Poplar Gene ID (v 3.0)</b> | <b>Primer sequence</b>                                   |
|-------------------|-------------------------------|----------------------------------------------------------|
| <i>PtaJAZ3</i>    | Potri.010G108<br>200          | F;TAAGTGCAGACGCATGTGATCC<br>R;GCGACCGGAAACATCTGGATTTC    |
| <i>PtaRAP2.6</i>  | Potri.001G067<br>600          | F;ACCGACAATAACGTCCCAACGG<br>R;TGACGACGGATTGATGGAGAGC     |
| <i>PtaNRAMP1</i>  | Potri.005G181<br>100          | F;TGCACTGGTTGTAGCACTCTGC<br>R;ACAGCTCTAGCTTCCTCACACC     |
| <i>PtaNAS4</i>    | Potri.004G193<br>400          | F;ACTGCCTTGCCTGAAGAAGTGC<br>R;CCTCGGCATGGCCACATAAATTG    |
| <i>PtaXTR6</i>    | Potri.006G170<br>100          | F;TCTTGGTCAAGAGTGCTACCGAAG<br>R;GCTTGTGGAAGATCCCAGTGAAAC |
| <i>PtaUGT71B2</i> | Potri.016G014<br>500          | F;CAATGGCAATGGTCTGAGCC<br>R;ATCTCATCGTGGTATGGCCC         |
| <i>PtaMIPS</i>    | Potri.005G078<br>700          | F;GTGCGTTTGTGTGCGATTGTGG<br>R;GCCATGTTACAACAGGCACACC     |
| <i>PtaTIP1;3</i>  | Potri.009G027<br>200          | F;CCTCACAAAGGCTCCTCTTGTTC<br>R;TTGCACGTTGCTTTGACAGTGC    |
| <i>PtaCCR</i>     | Potri.001G045<br>000          | F;ACTTCCATGCCAAGGCCAAAC<br>R;AATTCTTGGGATCAGCTGGGTTTC    |
| <i>PtaB12D</i>    | Potri.017G098<br>800          | F;GCGTTGGATGAAACCAGAGGTC<br>R;CAAACCTTGTTACACAGGTCATCGC  |
| <i>PtaEFH</i>     | Potri.017G086<br>200          | F;GGCTGTGGAGTGGGAATCTG<br>R;TTTGCTACATTCAGCTAAACTTGGA    |
| <i>PtaC4H</i>     | Potri.018G146<br>100          | F;TTGGCATCGCCCAACATCCAAC<br>R;TTTGGCGAAGATTCTCCGAGAGG    |
| <i>PtaEXTL</i>    | Potri.010G072<br>200          | F;CCCTGATTGCTTAGGGACACCATC<br>R;CGGCCACATTAGCATCGTTGAC   |
| <i>PtaEXPB1</i>   | Potri.003G083<br>200          | F;ACTTTCATGGCCTTTGGTGGTG<br>R;TTTGATTGCTTGCCACCTGGAC     |
| <i>PtaCYCB2;4</i> | Potri.005G251<br>400          | F;TGGTTACGCAGCAAAGAACG<br>R;GGACAACCAATGAGAGACGGT        |
| <i>PtaSAUR37</i>  | Potri.006G278<br>100          | F;ATCAAGAACCACTGCAGTTCTAC<br>R;AGGAATCCTTAAGACACCTGCC    |
| <i>PtaARF1AF</i>  | Potri.008G100<br>000          | F;TGGAGTGTCCGTCAAGTCAC<br>R;GGGTTTTATCTCCGGCACCT         |
| <i>PtaGH16</i>    | Potri.006G071                 | F;CTGGAAACTCTGCCGGAAC                                    |

|                 |                      |                                                      |
|-----------------|----------------------|------------------------------------------------------|
|                 | 200                  | R;GGTGGGGTTCGAACCAAAGAT                              |
| <i>PtaGRF</i>   | Potri.014G020<br>100 | F;ATACCCTGTAGTATACCCAAGCTC<br>R;GTCACAGAATCCCGAGGCAG |
| <i>PtaEBF1</i>  | Potri.006G068<br>500 | F;CCAATGTGGATGTATACAGCC<br>R;GCAACAGCAACCCTGTAGCTG   |
| <i>PtaCDC2</i>  | Potri.004G133<br>500 | F;TGGAAACTCCCACCTGAGAC<br>R;AAGCTTCAGCGCGTTGGTA      |
| <i>PtaXTH23</i> | Potri.018G095<br>100 | F;CCCAACTGCTGATTTCCACA<br>R;GGCCCAATCTGTCTTGACCA     |
| <i>PtaUBQ</i>   | Potri.002G224<br>700 | F;AGAGTGTGAGAGAGAGAAGAG<br>R;CGACGACCATCAAACAAGAAG   |
