# Supplementary material for: Gene network analysis of poplar root transcriptome in response to drought stress identifies a PtaJAZ3PtaRAP2.6-centered hierarchical network
Source: PubMed Central journal article supplement (PMC6291141; doi:10.1371/journal.pone.0208560), 2018-12-12
Supplement: pone.0208560.s006.pdf [file pone.0208560.s006.pdf]

**S2 Table. Primers used for cloning of the nine superhub genes.**

| <b>Superhub</b>                                                  | <b>Poplar Gene ID<br/>(v 3.0)</b> | <b>Primer name and sequence (5'→3')</b>                                                                                    |
|------------------------------------------------------------------|-----------------------------------|----------------------------------------------------------------------------------------------------------------------------|
| Zinc Finger<br>CCCH Domain<br>Containing66/Pt<br>aCCCH66         | Potri.001G252600                  | fPEG1;GGGACAAGTTTGTACAAAAAAGCAGGCTATGTG<br>CAGTGGTAC<br>rPEG1;GGGGACCACTTTGTACAAGAAAGCTGGGTTTCT<br>AAGCCACTAATGG           |
| High mobility<br>group<br>(HMG1/2)<br>family/PtaHMG              | Potri.003G138000                  | fPEG2;GGGACAAGTTTGTACAAAAAAGCAGGCTATGG<br>CAGATACCGCT<br>rPEG2;GGGGACCACTTTGTACAAGAAAGCTGGGTTTCT<br>ACTGCTGTTGTTTGTGTC     |
| NUCLEAR<br>RECEPTOR<br>CO-<br>REPRESSOR<br>RELATED<br>1/PtaNCOR1 | Potri.010G220000                  | fPEG3;GGGACAAGTTTGTACAAAAAAGCAGGCTATGCC<br>GCCAGAGCCATTGC<br>rPEG3;GGGGACCACTTTGTACAAGAAAGCTGGGTTCTA<br>CCTGCCTATGTCC      |
| Myb-like<br>transcriptional<br>regulator family<br>/PtaMYBL      | Potri.016G001100                  | fPEG5;GGGGACAAGTTTGTACAAAAAAGCAGGCTATG<br>GATCTGGATTGTGAAGC<br>rPEG5;GGGGACCACTTTGTACAAGAAAGCTGGGTCTAA<br>AGGTCAGTGCCTAAGA |
| JASMONATE-<br>ZIM-DOMAIN<br>3/PtaJAZ3                            | Potri.010G108200                  | fPEG4;GGGACAAGTTTGTACAAAAAAGCAGGCTATGG<br>AAAGAGATTTTTTGGG<br>rPEG4;GGGGACCACTTTGTACAAGAAAGCTGGGTTTAG<br>TAGGGTTCGGGGTTGG  |
| PtabZIP61                                                        | Potri.019G091900                  | fPEG6;GGGGACAAGTTTGTACAAAAAAGCAGGCTATG<br>AGGAGAGGTCAGAAGTG<br>rPEG6;GGGGACCACTTTGTACAAGAAAGCTGGGTTTAT<br>TGGGGTTTGCCATCAT |
| RELATED TO<br>AP2.6/PtaRAP2.<br>6                                | Potri.001G067600                  | fPEG7;GGGACAAGTTTGTACAAAAAAGCAGGCTATGTC<br>TTCTATGGTTTCAGC<br>rPEG7;GGGGACCACTTTGTACAAGAAAGCTGGGTTTAC<br>TCGCTAGGATTACTGG  |
| zinc finger<br>(C3HC4-type)<br>RING finger<br>family             | Potri.008G134900                  | fPEG8;GGGGACAAGTTTGTACAAAAAAGCAGGCTATG<br>GAGAAGGACATGGAAGG<br>rPEG8;GGGGACCACTTTGTACAAGAAAGCTGGGTTCAA<br>TATGCAGGCCAGTAGT |

|                                           |                  |                                                                                                                           |
|-------------------------------------------|------------------|---------------------------------------------------------------------------------------------------------------------------|
| /PtaC3HC4L                                |                  |                                                                                                                           |
| NAC Domain<br>Containing<br>028/PtaNAC028 | Potri.017G086200 | fPEG9;GGGGACAAGTTTGTACAAAAAAGCAGGCTATGT<br>CATCCGAAAATGATTC<br>rPEG9;GGGGACCACTTTGTACAAGAAAGCTGGGTTCAT<br>ACCTGTTCAATTCCT |
