# Supplementary material for: Gene network analysis of poplar root transcriptome in response to drought stress identifies a PtaJAZ3PtaRAP2.6-centered hierarchical network
Source: PubMed Central journal article supplement (PMC6291141; doi:10.1371/journal.pone.0208560), 2018-12-12
Supplement: pone.0208560.s007.pdf [file pone.0208560.s007.pdf]

**S3 Table. Significantly enriched GO-term associated with the genes terminally connected to hubs associated with *PtaJAZ3* and *PtaRAP2.6* as shown in Fig 4.**

| Hubs                            | GO Ontology                                                                                     | Corrected p-values |
|---------------------------------|-------------------------------------------------------------------------------------------------|--------------------|
| <i>PtaCYCB2;3</i><br>(54 Genes) | GO:0043687: post-translational protein modification                                             | 0.017              |
|                                 | GO:0060255: regulation of macromolecule metabolic process                                       | 0.018              |
|                                 | GO:0010468: regulation of gene expression                                                       | 0.021              |
|                                 | GO:0006139: nucleobase, nucleoside, nucleotide and nucleic acid metabolic process               | 0.021              |
|                                 | GO:0044260: cellular macromolecule metabolic process                                            | 0.042              |
| <i>PtaSAUR37</i><br>(94 Genes)  | GO:0010467: gene expression                                                                     | 0.00029            |
|                                 | GO:0034645: cellular macromolecule biosynthetic process                                         | 0.0005             |
|                                 | GO:0051726: regulation of cell cycle                                                            | 0.002              |
|                                 | GO:0051171: regulation of nitrogen compound metabolic process                                   | 0.0005             |
|                                 | GO:0019222: regulation of metabolic process                                                     | 0.0012             |
| <i>PtaARFA1F</i><br>(117 Genes) | GO:0009059: macromolecule biosynthetic process                                                  | 0.0043             |
|                                 | GO:0080090: regulation of primary metabolic process                                             | 0.0029             |
|                                 | GO:0019222: regulation of metabolic process                                                     | 0.0029             |
|                                 | GO:0048527: lateral root development                                                            | 0.029              |
|                                 | GO:0045449: regulation of transcription                                                         | 0.029              |
|                                 | GO:0031323: regulation of cellular metabolic process                                            | 0.031              |
| <i>PtaGH16</i><br>(59 Genes)    | GO:0050789: regulation of biological process                                                    | 0.37               |
|                                 | GO:0008152: metabolic process                                                                   | 0.025              |
|                                 | GO:0019219: regulation of nucleobase, nucleoside, nucleotide and nucleic acid metabolic process | 0.025              |
|                                 | GO:0010468: regulation of gene expression                                                       | 0.025              |
|                                 | GO:0007049: cell cycle                                                                          | 0.039              |
| <i>PtaGRF</i><br>(70 Genes)     | GO:0045449: regulation of transcription                                                         | 0.045              |
|                                 | GO:0080090: regulation of primary metabolic process                                             | 0.029              |
|                                 | GO:0019222: regulation of metabolic process                                                     | 0.029              |
|                                 | GO:0031326: regulation of cellular biosynthetic process                                         | 0.029              |
|                                 | GO:0031323: regulation of cellular metabolic process                                            | 0.029              |
|                                 | GO:0044249: cellular biosynthetic process                                                       | 0.029              |
| <i>PtaEBF1</i><br>(49 Genes)    | GO:0045449:regulation of transcription                                                          | 0.029              |
|                                 | GO:0031326: regulation of cellular biosynthetic process                                         | 6.20E-05           |
|                                 | GO:0031323: regulation of cellular metabolic process                                            | 6.20E-05           |
|                                 | GO:0045449: regulation of transcription                                                         | 6.50E-05           |
|                                 | GO:0010468: regulation of gene expression                                                       | 6.50E-05           |
|                                 | GO:0019219: regulation of nucleobase, nucleoside, nucleotide and nucleic acid metabolic process | 6.50E-05           |
| <i>PtaCDC2</i><br>(270 Genes)   | GO:0051171: regulation of nitrogen compound metabolic process                                   | 0.00015            |
|                                 | GO:0044249: cellular biosynthetic process                                                       | 0.00069            |
|                                 | GO:0055114: oxidation reduction                                                                 | 0.00078            |
|                                 | GO:0043687: post-translational protein modification                                             | 0.0046             |
|                                 | GO:0009059: macromolecule biosynthetic process                                                  | 0.0046             |
|                                 | GO:0006950: response to stress                                                                  | 0.0046             |
|                                 | GO:0009987: cellular process                                                                    | 0.007              |
|                                 |                                                                                                 | 0.007              |

|                               |                                                                                   |       |
|-------------------------------|-----------------------------------------------------------------------------------|-------|
| <i>PtaXTH23</i><br>(31 Genes) | GO:0031326: regulation of cellular biosynthetic process                           | 0.009 |
|                               | GO:0031323: regulation of cellular metabolic process                              | 0.017 |
|                               | GO:0006807: nitrogen compound metabolic process                                   | 0.017 |
|                               | GO:0045449: regulation of transcription                                           | 0.027 |
|                               | GO:0006139: nucleobase, nucleoside, nucleotide and nucleic acid metabolic process |       |

The number of genes connected to each hub is shown in the parenthesis. The agriGO tool (<http://bioinfo.cau.edu.cn/agriGO/>) was used to perform the enrichment analysis using SEA (Singular Enrichment Analysis) coupled with available background data of *Populus trichocarpa* genome data (V 3.0). Abbreviations for the eight hubs connected to *PtaJAZ3* and *PtaRAP2.6* are as follows: 1. *PtaCYCB2;4* (Cycline B2;4, Potri.005G251400); 2. *PtaSAUR37* (Small Auxin Upregulated RNA 37, Potri.006G278100); 3. *PtaARFA1F* (ADP-Ribosylation Factor A1F, Potri.008G100000); 4. *PtaGHI6* (Glycosyl Hydrolases family 16, Potri.006G071200); 5. *PtaGRF* (Gibberellin-Regulated Family protein, Potri.014G020100); 6. *PtaEBF1* (EIN3-Binding F-box protein1, Potri.006G068500); 7. *PtaCDC2* (Cell Division Control 2, Potri.004G133500) and 8. *PtaXTH23* (Xyloglucan Endotransglucosylase/Hydrolase 23, Potri.018G095100).
